# Supplementary material for: A rapid RIG-I signaling relay mediates efficient antiviral response
Source: PubMed Central journal article supplement (PMC9825657; doi:10.1016/j.molcel.2022.11.018), 2022-12-06
Supplement: NIHMS1858447-supplement-1.pdf [file NIHMS1858447-supplement-1.pdf]

**Molecular Cell, Volume 83**

**Supplemental information**

**A rapid RIG-I signaling relay  
mediates efficient antiviral response**

**Daniel T. Thoresen, Drew Galls, Benjamin Götte, Wenshuai Wang, and Anna M. Pyle**

Supplemental Figure 1

A

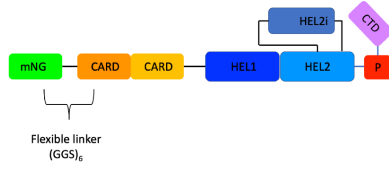

C

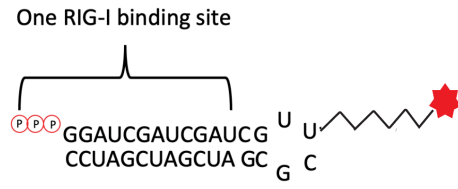

B

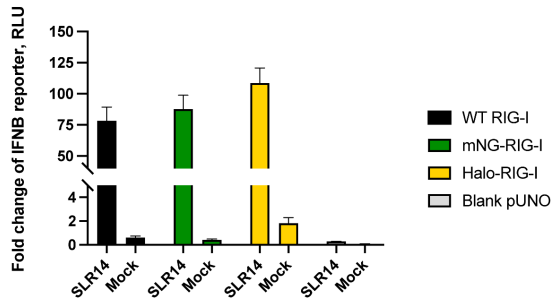

D

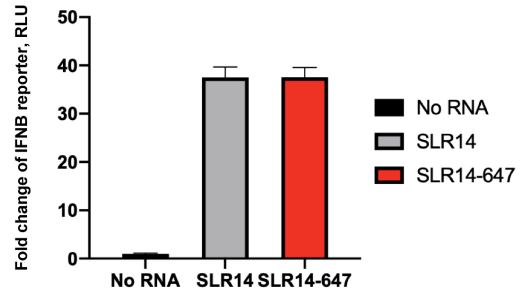

Supplemental Figure 2

**A**

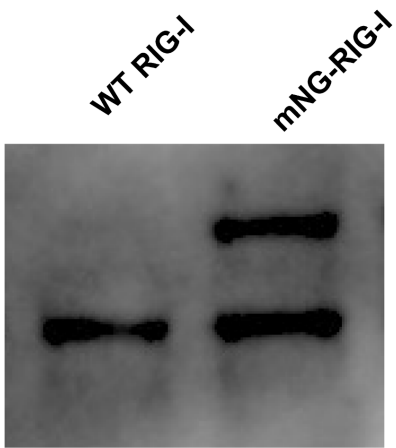

**B**

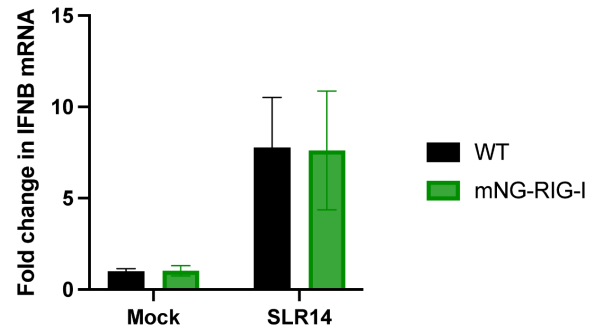

**C**

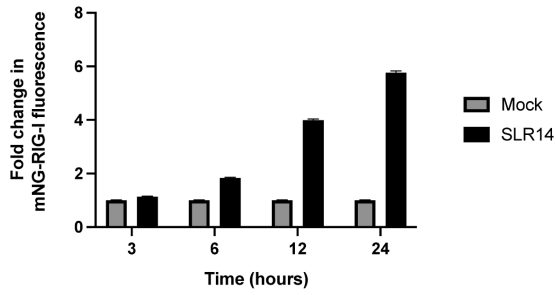

**D**

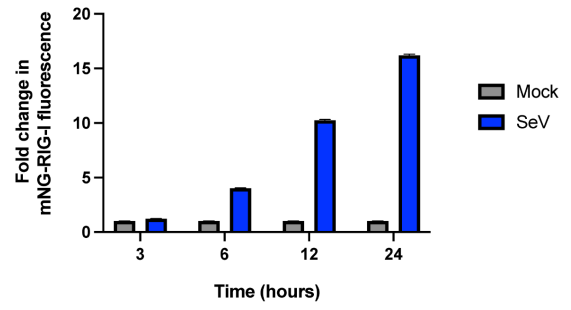

# Supplemental Figure 3

A

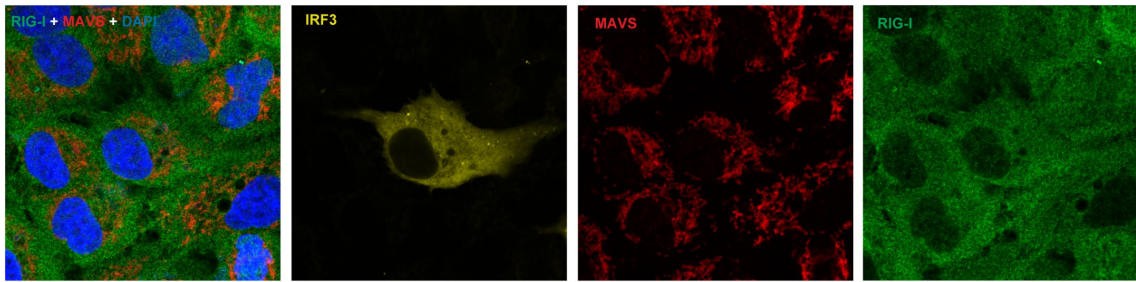

B

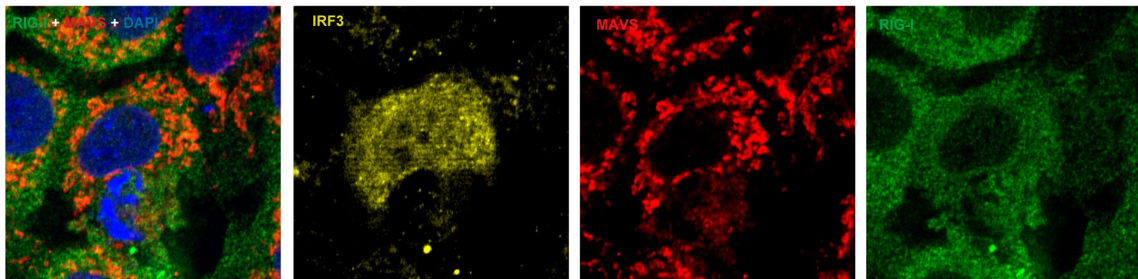

C

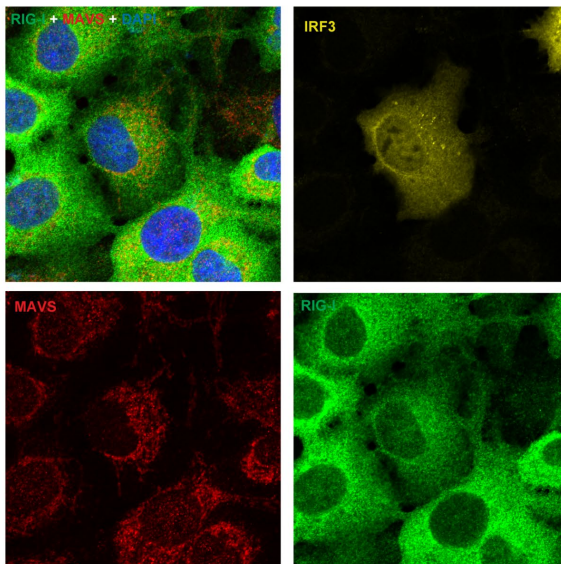

D

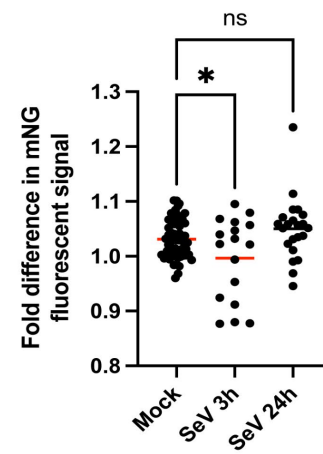

E

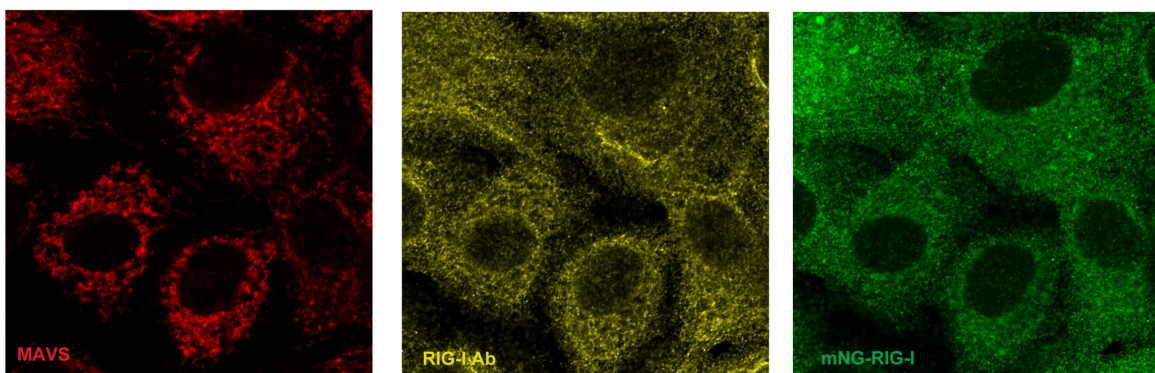

**Supplementary Figure 1: Fluorescent labeling of both RIG-I and RNA has no effect on RIG-I signaling. Related to Figure 2.**

**(A)** Schematic representation of the domains of RIG-I, and the location of the mNeonGreen fluorescent tag via N-terminal linker. **(B)** RIG-I signaling response in HEK293T cells expressing unlabeled RIG-I (WT RIG-I), mNG-RIG-I, Halo-RIG-I, or no additional RIG-I (Blank pUNO) was measured via relative luciferase activity at 12h following stimulation with 1  $\mu$ g/mL SLR14 or mock transfection. **(C)** Schematic representation of the location of the fluorescent tag on SLR14. **(D)** RIG-I response in HEK293T cells expressing unlabeled pUNO-RIG-I was measured via relative luciferase activity at 12h following stimulation with 100 ng/mL SLR14 or SLR14-647. Data represent the means of three independent experiments. Error bars indicate standard deviation.

**Supplementary Figure 2: Introduction of mNG tag to endogenous RIG-I in A549 cells does not disrupt signaling or expression. Related to Figure 3.**

**(A)** Total cell lysate from unlabeled A549 cells (WT RIG-I) and mNG-RIG-I cells was collected and immunoblotted for RIG-I and GAPDH (not shown). **(B)** WT and mNG-RIG-I A549 cells were mock-transfected or stimulated with 100 ng/mL SLR14 for 6h prior to total RNA extraction, and the fold change in IFNB mRNA expression relative to mock-treated cells was measured via RT-qPCR. **(C and D)** mNG-RIG-I A549 cells were mock-treated or stimulated with 1  $\mu$ g/mL SLR14 **(C)** or 100 HA units/mL SeV **(D)** for 3-24h prior to measurement of total cellular mNG fluorescence in 10,000 cells/condition via flow cytometry. The fold increase in mean cellular mNG fluorescence relative to mock-stimulated cells at 3h in each condition is shown. Data are means of three independent experiments. Error bars indicate standard deviation (B) or standard error of the mean (C).

**Supplementary Figure 3: Immunolabeled RIG-I and MAVS do not display increased colocalization following RIG-I stimulation. Related to Figure 4.**

**(A)** mNG-RIG-I A549 cells were transfected with pUNO-mCherry-IRF3 (yellow) 48h prior to fixation and immunolabeled with Rb anti-MAVS (red). **(B)** mNG-RIG-I A549 cells were transfected with pUNO-mCherry-IRF3 (yellow) 48h prior to fixation, infected with 100 HA units/mL SeV 3h prior to fixation and immunolabeled with Rb anti-MAVS (red). **(C)** mNG-RIG-I A549 cells were transfected with pUNO-mCherry-IRF3 (yellow) 48h prior to fixation, infected with 100 HA units/mL SeV 24h prior to fixation and immunolabeled with Rb anti-MAVS (red). **(D)** The mean RIG-I fluorescent signal directly overlapping MAVS and the mean RIG-I fluorescent signal 300 nm away from MAVS were calculated for each cell, and

the ratio of the two values was plotted for cells that were mock-infected (n = 60), SeV-infected for 3h (n = 17) or SeV-infected for 24h (n = 22). **(E)** mNG-RIG-I A549 cells were infected with 100 HA units/mL for 3h prior to fixation and immunolabeled with Rb anti-MAVS (red) and Ms anti-RIG-I (yellow).
